# Supplementary material
Source: Springer Nature journal article supplement (https://www.springermedizin.de/resource/supplementary/13018_2006_8_MOESM1_ESM.pdf/9636156)

**R**

Cranial Lateral  
Femoral Condyle

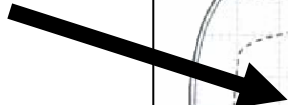

Caudal Lateral  
Femoral Condyle

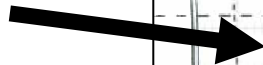

Cranial Medial  
Femoral Condyle

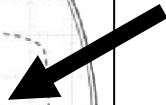

Caudal Medial  
Femoral Condyle

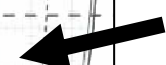

Caudal Lateral Tibial  
Plateau

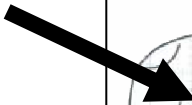

Cranial Lateral Tibial  
Plateau

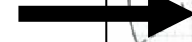

Caudal Medial Tibial  
Plateau

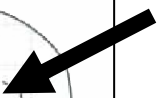

Cranial Medial Tibial  
Plateau

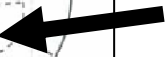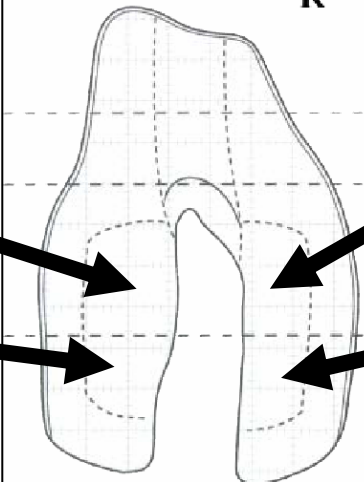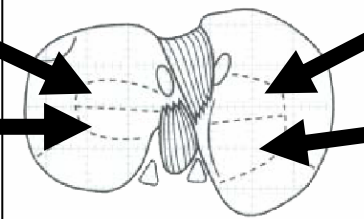

Supplement: MOESM1 [file 9636156]
